# Supplementary material for: Nmnat1 protects neuronal function without altering phospho‐tau pathology in a mouse model of tauopathy
Source: PubMed Central journal article supplement — Ann Clin Transl Neurol. 2016 May 6;3(6):434–42. doi: 10.1002/acn3.308 (PMC4891997; doi:10.1002/acn3.308), 2016-05-06
Supplement: ACN3-3-434-s001.pdf [file ACN3-3-434-s001.pdf]

# Supplemental Information

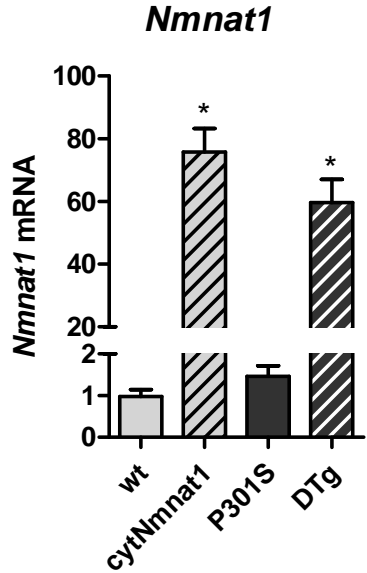

**Fig. S1: cytNmnat expression is not significantly impacted by P301S transgene expression.** Nmnat1 mRNA was quantified by qPCR in cortex samples. \* $p < 0.05$  by 1-way ANOVA with Bonferroni's post-test as compared to wt.

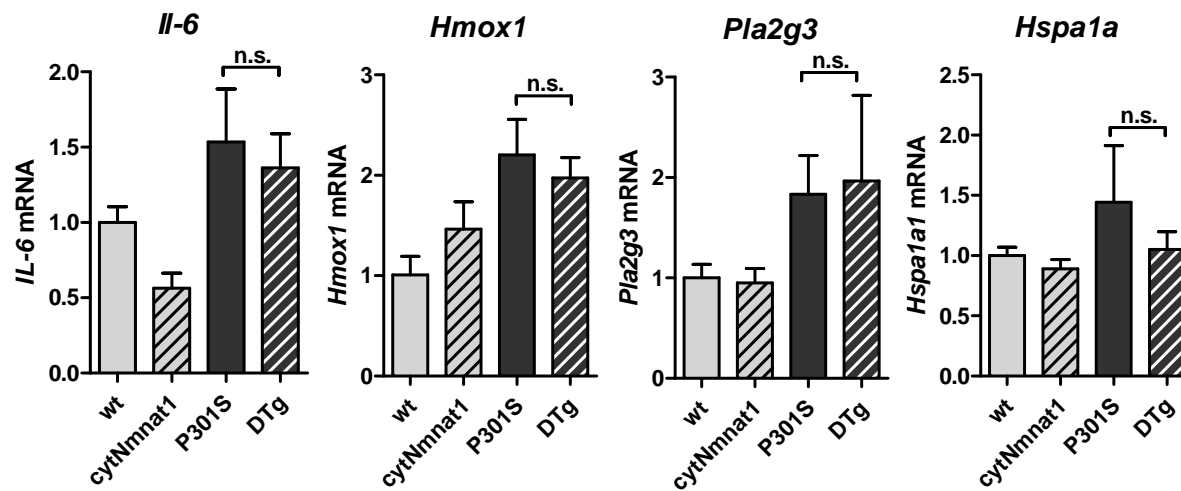

**Fig. S2: Inflammation and oxidative stress response in P301S tau mice are not altered by *cytNmnat1* overexpression.** Cortex samples from wt, *cytNmnat1*, P301S, and DTg mice were subjected to qPCR analysis of mRNA expression of *Il6* (inflammatory cytokine), *Hmox1* and *Pla2g3* (oxidative stress responsive genes) and *Hspa1a* (a subunit of the chaperone hsp70). A trends toward increase in all markers was observed in tau-expressing mice. However, no significant difference between P301S and DTg mice was observed for any of these markers. \*\* $p < 0.05$  by 1-way ANOVA as compared to wt. n.s. non-significant.
